# Supplementary material
Source: Springer Nature journal article supplement (https://www.springermedizin.de/resource/supplementary/12913_2012_2643_MOESM9_ESM.pdf/9531042)
Supplement: MOESM9 [file 9531042]

## Additional file 9: Data Extraction Matrix

| Anonymised Patient ID:                                        |     |    |          |
|---------------------------------------------------------------|-----|----|----------|
| Question                                                      | yes | no | comments |
| Was there evidence of goal negotiation?                       |     |    |          |
| Were specific goals set by the health professionals involved? |     |    |          |
| Was a predicted outcome date set in relation to the goal?     |     |    |          |
| Were action plans set in relation to goals?                   |     |    |          |
| Were coping plans set in relation to action plans?            |     |    |          |
| Was confidence measured in relation to action plans?          |     |    |          |
| Was performance appraised and feedback given?                 |     |    |          |
| Were subsequent goals set?                                    |     |    |          |
| Any other relevant information?                               |     |    |          |
